# Supplementary material
Source: PubMed Central journal article supplement (PMC10952498)
Supplement: aem.02327-23-s0001.pdf [file aem.02327-23-s0001.pdf]

## Supplemental Material:

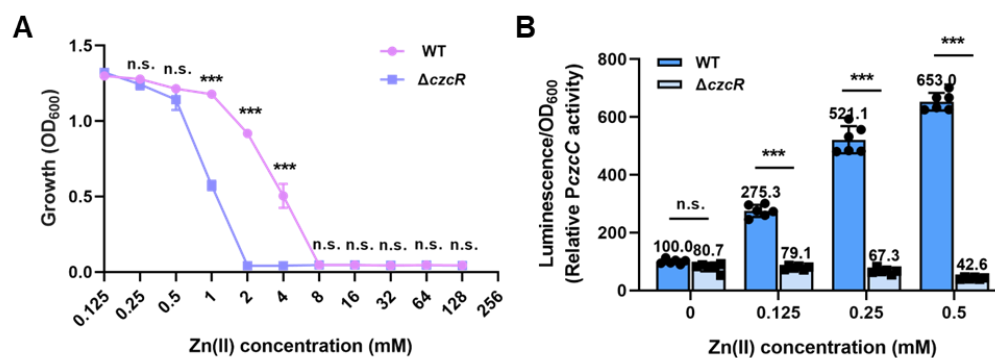

**Figure S1. Growth of the PAO1 WT and  $\Delta czcR$  strains and the activity of the *PczcC* promoter during treatments with different concentrations of Zn. (A) Final values of OD<sub>600</sub> were measured for the PAO1 WT and  $\Delta czcR$  strains when they were cultured in the presence of Zn at different concentrations. (B) Expression of the *PczcC-lux* was measured in the WT and  $\Delta czcR$  strains when they were cultured in the presence of Zn at different concentrations. Statistical significance was calculated compared to the WT group based on two-way ANOVA (n.s., not significant; \*\*\*,  $P < 0.001$ ).**

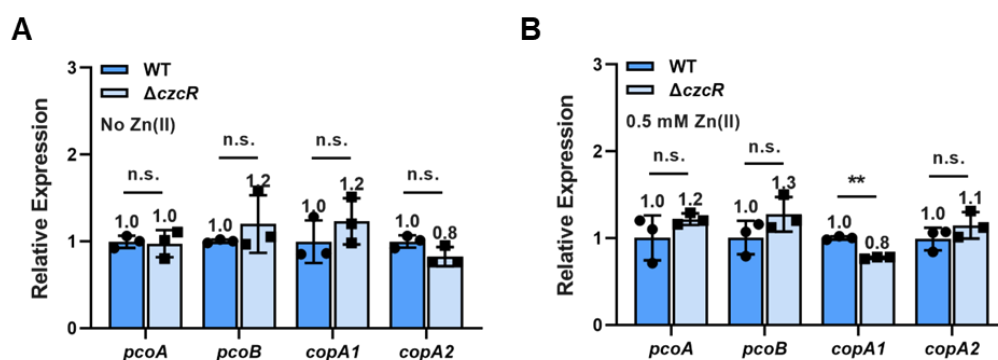

**Figure S2. *CzcS/CzcR* did not cause obvious expression changes of other major genes involved in Cu tolerance besides *ptrA* and *PA2807*. Relative expression of the *pcoA*, *pcoB*, *copA1*, and *copA2* in the  $\Delta czcR$  strain compared to the WT strain when they were cultured in the absence (A) or presence (B) of Zn. Statistical significance was calculated compared to the WT group based on Student's *t*-test (n.s., not significant; \*\*,  $P < 0.01$ ).**

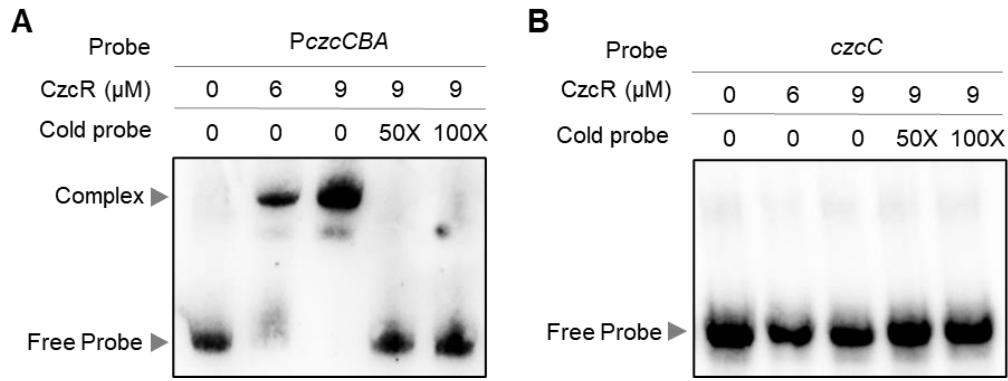

**Figure S3. Positive and negative controls to determine specific interactions between CzcR and target DNA probes.** EMSAs showed the binding ability of CzcR at the promoter of *czcCBA* (A) but not the coding region of *czcC* (B).

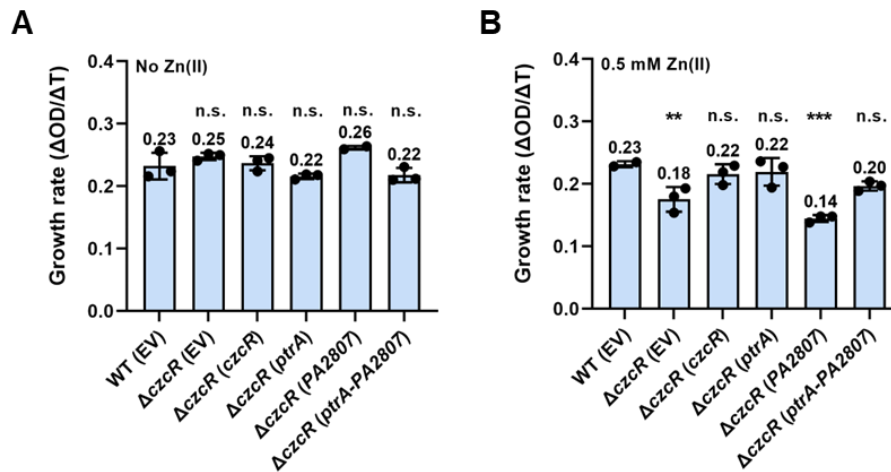

**Figure S4. CzcS/CzcR maintained bacterial tolerance to Cu via PtrA during Zn excess.**

(A) Growth rates of the WT strain,  $\Delta$ zcR mutant, and the  $\Delta$ zcR mutant with the overexpression of *ptrA*, *PA2807*, or *ptrA-PA2807* in the presence of 2 mM CuSO<sub>4</sub> when the strains were not pretreated with Zn. (B) Growth rates of the WT strain,  $\Delta$ zcR mutant, and the  $\Delta$ zcR mutant with the overexpression of *ptrA*, *PA2807*, or *ptrA-PA2807* in the presence of 2 mM CuSO<sub>4</sub> after the strains were pretreated with Zn. Statistical significance was calculated compared to the WT (EV) group based on one-way ANOVA (n.s., not significant; \*\*,  $P < 0.01$ ; \*\*\*,  $P < 0.001$ ).

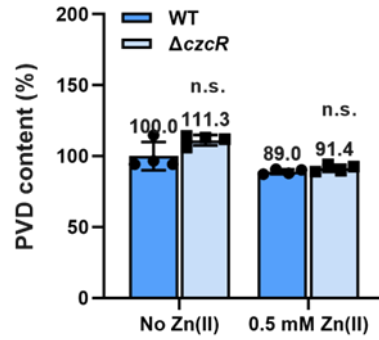

**Figure S5.** Production of pyoverdine (PVD) was measured in WT and  $\Delta czcR$  strains when they were cultured in the absence or presence of Zn. Statistical significance was calculated compared to the WT group based on Student's *t*-test (n.s., not significant).

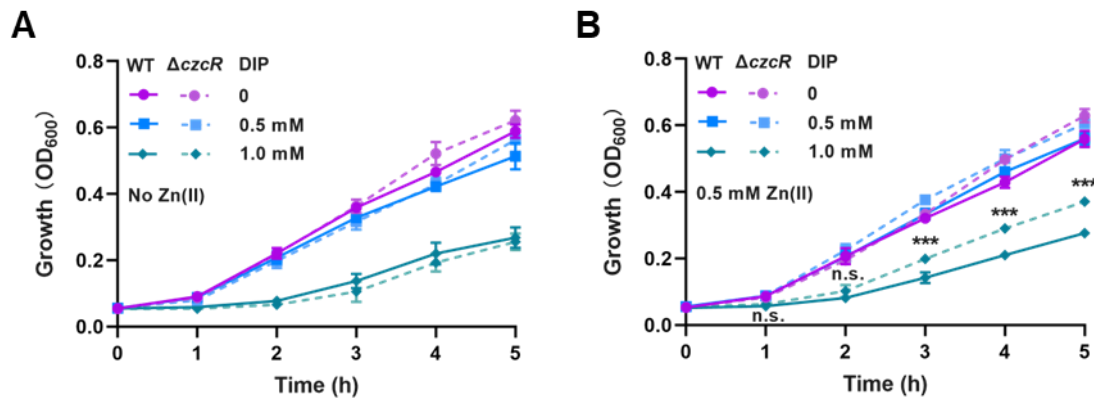

**Figure S6.** Deletion of *czcR* promoted cell growth under Fe depletion and Zn excess conditions. (A) Growth of the WT strain and the  $\Delta czcR$  mutant in the absence or presence of 0.5 mM and 1.0 mM DIP when two strains were not pretreated with Zn. (B) Growth of the WT strain and the  $\Delta czcR$  mutant in the absence or presence of 0.5 mM and 1.0 mM DIP when two strains were pretreated with Zn. Statistical significance was calculated compared to the WT group based on two-way ANOVA (n.s., not significant; \*\*\*, *P* < 0.001).

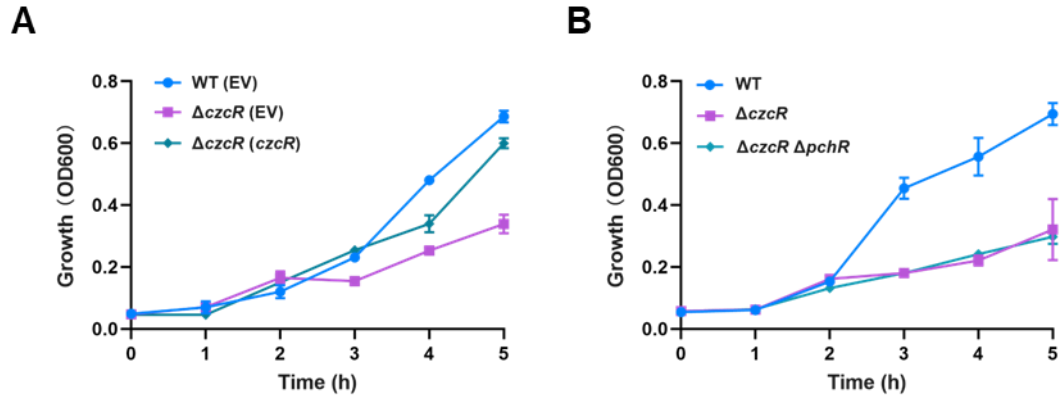

**Figure S7. Deletion of *czcR* increased cell susceptibility to exogenous H<sub>2</sub>O<sub>2</sub>.** (A) Growth of the WT strain,  $\Delta czcR$  mutant, and the  $\Delta czcR$  mutant with the complementation of *czcR* in the presence of 0.75 mM H<sub>2</sub>O<sub>2</sub> when the strains were pretreated with Zn. (B) Growth of the WT strain,  $\Delta czcR$  and  $\Delta czcR \Delta pchR$  mutants in the presence of 0.75 mM H<sub>2</sub>O<sub>2</sub> when the strains were pretreated with Zn.

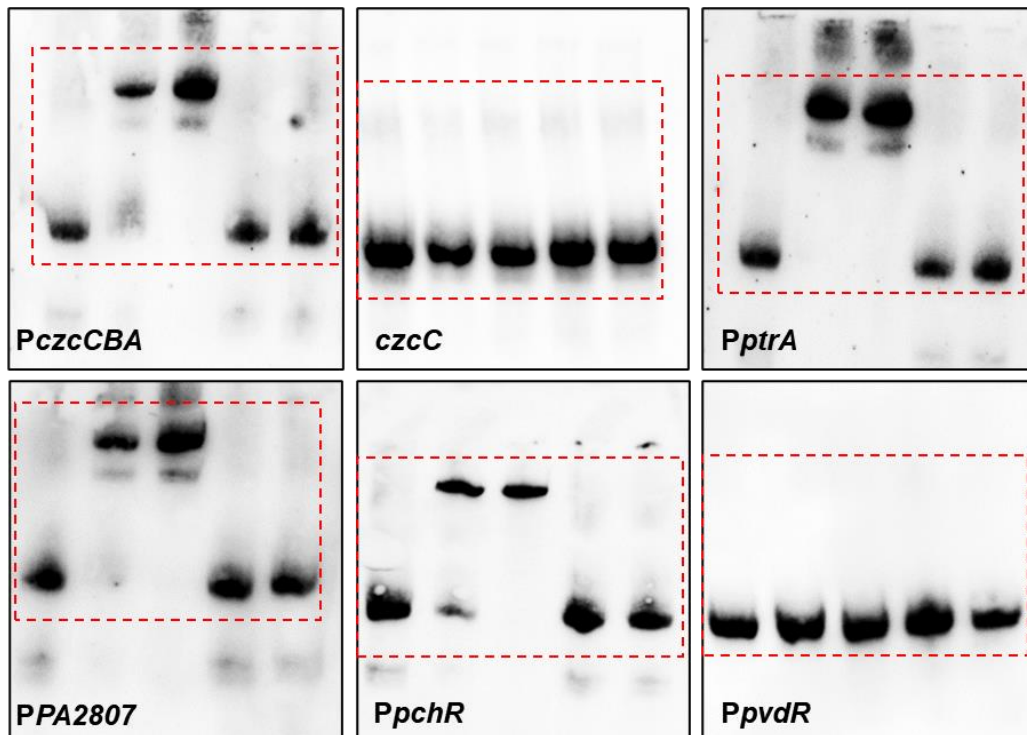

**Figure S8. Uncropped gel images of the EMSA results obtained from this study.** *PczcCBA* and *czcC* were used in Figure S3A and Figure S3B, *PptrA* and *PPA2807* were used in Figure 2C, *PpchR* and *PpvdR* were used in Figure 5F.

**Table S2. Bacterial strains, plasmids, and primers used in this study**

| <b>1. Strains</b>                         |                                                                                         |                                                                             |
|-------------------------------------------|-----------------------------------------------------------------------------------------|-----------------------------------------------------------------------------|
| <b>Name</b>                               | <b>Description</b>                                                                      |                                                                             |
| DH5 $\alpha$                              | <i>E. coli</i> strain used for plasmid construction and propagation                     |                                                                             |
| BL21(DE3)                                 | <i>E. coli</i> strain used for protein expression and purification                      |                                                                             |
| SM10                                      | <i>E. coli</i> strain used for conjugation                                              |                                                                             |
| PAO1 WT                                   | <i>P. aeruginosa</i> PAO1 wild-type strain from lab collection                          |                                                                             |
| $\Delta czcR$                             | PAO1 with the deletion of <i>czcR</i>                                                   |                                                                             |
| $\Delta czcR$ ( <i>czcR</i> )             | PAO1 $\Delta czcR$ with the <i>in trans</i> expression of <i>czcR</i>                   |                                                                             |
| $\Delta pchR$                             | PAO1 with the deletion of <i>pchR</i>                                                   |                                                                             |
| $\Delta czcR \Delta pchR$                 | PAO1 with the double deletion of <i>czcR</i> and <i>pchR</i>                            |                                                                             |
| $\Delta czcR$ ( <i>ptrA</i> )             | PAO1 $\Delta czcR$ with the <i>in trans</i> expression of <i>ptrA</i>                   |                                                                             |
| $\Delta czcR$ (2807)                      | PAO1 $\Delta czcR$ with the <i>in trans</i> expression of <i>PA2807</i>                 |                                                                             |
| $\Delta czcR$ ( <i>ptrA</i> -2807)        | PAO1 $\Delta czcR$ with the <i>in trans</i> expression of <i>ptrA</i> and <i>PA2807</i> |                                                                             |
| $\Delta pchR$ ( <i>pchR</i> )             | PAO1 $\Delta pchR$ with the <i>in trans</i> expression of <i>pchR</i>                   |                                                                             |
| $\Delta czcR \Delta pchR$ ( <i>pchR</i> ) | PAO1 $\Delta czcR \Delta pchR$ with the <i>in trans</i> expression of <i>pchR</i>       |                                                                             |
| <b>2. Plasmids</b>                        |                                                                                         |                                                                             |
| <b>Name</b>                               | <b>Description</b>                                                                      |                                                                             |
| mini-CTX- <i>PptrA-lux</i>                | mini-CTX- <i>lux</i> containing promoter of <i>ptrA</i>                                 |                                                                             |
| mini-CTX- <i>PPA2807-lux</i>              | mini-CTX- <i>lux</i> containing promoter of <i>PA2807</i>                               |                                                                             |
| mini-CTX- <i>PpchD-lux</i>                | mini-CTX- <i>lux</i> containing promoter of <i>pchD</i>                                 |                                                                             |
| mini-CTX- <i>PpchR-lux</i>                | mini-CTX- <i>lux</i> containing promoter of <i>pchR</i>                                 |                                                                             |
| mini-CTX- <i>PpchE-lux</i>                | mini-CTX- <i>lux</i> containing promoter of <i>pchE</i>                                 |                                                                             |
| pBBR1- <i>czcR</i>                        | pBBR1-MCS5 to express the <i>czcR</i> gene                                              |                                                                             |
| pBBR1- <i>ptrA</i>                        | pBBR1-MCS5 to express the <i>ptrA</i> gene                                              |                                                                             |
| pBBR1- <i>PA2807</i>                      | pBBR1-MCS5 to express the <i>PA2807</i> gene                                            |                                                                             |
| pBBR1- <i>ptrA</i> - <i>PA2807</i>        | pBBR1-MCS5 to express the <i>ptrA</i> and <i>PA2807</i> genes                           |                                                                             |
| pBBR1- <i>pchR</i>                        | pBBR1-MCS5 to express the <i>pchR</i> gene                                              |                                                                             |
| pET28a- <i>czcR</i>                       | For <i>CzcR</i> expression and purification                                             |                                                                             |
| <b>3. Primer sequences</b>                |                                                                                         |                                                                             |
| <b>Name</b>                               | <b>Sequence (5' to 3')</b>                                                              | <b>Description</b>                                                          |
| <i>lux</i> - <i>PptrA</i> -F              | GGTCGACGGTATCGATAAGCTTGAAGCCTGCCTCGGCG                                                  | Amplify the <i>ptrA</i> promoter to construct <i>PptrA-lux</i> reporter     |
| <i>lux</i> - <i>PptrA</i> -R              | TCTAAAGAAGAATTGGGGATCCGGGAAGTCTCCTCGAA                                                  |                                                                             |
| <i>lux</i> - <i>PPA2807</i> -F            | GGTCGACGGTATCGATAAGCTTCGACGAAGAAGGACAAGG                                                | Amplify the <i>PA2807</i> promoter to construct <i>PPA2807-lux</i> reporter |
| <i>lux</i> - <i>PPA2807</i> -R            | TCTAAAGAAGAATTGGGGATCCTACATCTTTGTCTAGCTTGCCG                                            |                                                                             |
| <i>lux</i> - <i>PpchD</i> -F              | GGTCGACGGTATCGATAAGCTTCAGGTTTTCTGTAGCCCCG                                               | Amplify the <i>pchD</i> promoter to construct <i>PpchD-lux</i> reporter     |
| <i>lux</i> - <i>PpchD</i> -R              | TCTAAAGAAGAATTGGGGATCCGCGATCTCCGTGGATGCGGT                                              |                                                                             |
| <i>lux</i> - <i>PpchE</i> -F              | GGTCGACGGTATCGATAAGCTTCCGCTGAGTCTCCGCG                                                  | Amplify the <i>pchE</i> promoter to construct <i>PpchE-lux</i> reporter     |
| <i>lux</i> - <i>PpchE</i> -R              | TCTAAAGAAGAATTGGGGATCCGGGGGCTCCCTAGGGC                                                  |                                                                             |
| <i>lux</i> - <i>PpchR</i> -F              | GGTCGACGGTATCGATAAGCTTATTGTTGGGAAATGAGATTT                                              | Amplify the <i>pchR</i> promoter to construct <i>PpchR-lux</i> reporter     |
| <i>lux</i> - <i>PpchR</i> -R              | TCTAAAGAAGAATTGGGGATCCAGGTTTTCTCTGAGCCC                                                 |                                                                             |
| <i>lux</i> - <i>PpvdR</i> -F              | GGTCGACGGTATCGATAAGCTTGTGGACCTGGAACATCGCGA                                              | Amplify the <i>pvdR</i> promoter to construct <i>PpvdR-lux</i> reporter     |
| <i>lux</i> - <i>PpvdR</i> -R              | TCTAAAGAAGAATTGGGGATCCCGTCTCATTCCGGAATCCGG                                              |                                                                             |
| CTX- <i>lux</i> -veri-F                   | CGCGCGTAATACGACTCACTA                                                                   | Verify the construction of promoter- <i>lux</i> reporter                    |
| CTX- <i>lux</i> -veri-R                   | GCAATCTAATTTTTACCGGCAG                                                                  |                                                                             |
| <i>PpchR</i> -F                           | TCAGGTTTTCTGTAGCCCCG                                                                    | For EMSA assay                                                              |
| <i>PpchR</i> -R                           | GGAAGTCATGCGATCTCCGT                                                                    |                                                                             |

|                            |                                              |                                                                          |
|----------------------------|----------------------------------------------|--------------------------------------------------------------------------|
| <i>PpvdR</i> -F            | CATCCGCAGCCTGGT                              | For EMSA assay                                                           |
| <i>PpvdR</i> -R            | GGTTCGTCTCATTTCGGGA                          |                                                                          |
| <i>PczcC</i> -F            | GTTCCGCTCCTCGTCT                             | For EMSA assay                                                           |
| <i>PczcC</i> -R            | CGTGAGGGGCAATGCC                             |                                                                          |
| <i>PptrA</i> -F            | GGTACGCATGGGAAGTCTCC                         | For EMSA assay                                                           |
| <i>PptrA</i> -R            | GAAGCCTGCCTCGGCG                             |                                                                          |
| <i>PPA2807</i> -F          | CGGGAGCATTACATCTTTGT                         | For EMSA assay                                                           |
| <i>PPA2807</i> -R          | CGACGAAGAAGGACAAGGAA                         |                                                                          |
| <i>PczcC(in)</i> -F        | CCAGGGAGGTCTTCGCCA                           | For EMSA assay                                                           |
| <i>PczcC(in)</i> -R        | CCAGACCAGCGTCAGCAT                           |                                                                          |
| <i>pBBR-czcR</i> -F        | GGTCGACGGTATCGATAAGCTTATGCGCATCCTTATTATC     | Construct pBBR1- <i>czcR</i>                                             |
| <i>pBBR-czcR</i> -R        | GCCGCTCTAGAAGTCTAGTGGATCCTCATCGGCGCGCTTCCAG  |                                                                          |
| <i>pBBR-ptrA</i> -F        | GGTCGACGGTATCGATAAGCTTATGCGTACCTTCACTG       | Construct pBBR1- <i>ptrA</i>                                             |
| <i>pBBR-ptrA</i> -R        | GCCGCTCTAGAAGTCTAGTGGATCCTCAGCAGTTTTTCTTGT   |                                                                          |
| <i>pBBR-PA2807</i> -F      | GAGGTCGACGGTATCGATAAGCTTATGCTCCCGACAGCCA     | Construct pBBR1- <i>PA2807</i>                                           |
| <i>pBBR-PA2807</i> -R      | GCCGCTCTAGAAGTCTAGTGGATCCTCAGGGCTGCACGGTC    |                                                                          |
| <i>pBBR-ptrA-PA2807</i> -F | AGGTCGACGGTATCGATAAGCTTATGCGTACCTTCACTGC     | Construct pBBR1- <i>ptrA-PA2807</i>                                      |
| <i>pBBR-ptrA-PA2807</i> -R | GGCCGCTCTAGAAGTCTAGTGGATCCTCAGGGCTGCACGGTC   |                                                                          |
| <i>pBBR-pchR</i> -F        | AGGTCGACGGTATCGATAAGCTTATGACCATCACCATCA      | Construct pBBR1- <i>pchR</i>                                             |
| <i>pBBR-pchR</i> -R        | CCGCTCTAGAAGTCTAGTGGATCCTCAGCGGATCTCGCTG     |                                                                          |
| <i>pBBR-veri</i> -F        | TACGCAAACCGCCTCTCCCC                         | Verify the construction of plasmids for <i>in trans</i> expression       |
| <i>pBBR-veri</i> -R        | GCTGCGCAACTGTTGGGAAG                         |                                                                          |
| <i>pET28a-czcR</i> -F      | ACAGCAAATGGGTCGCGGATCCATGCGCATCCTTATTATCGAAG | Construct the plasmid pET28a- <i>czcR</i> for CzcR expression            |
| <i>pET28a-czcR</i> -R      | GGTGGTGGTGGTGGTGTCTCGAGTCATCGGCGCGCTTCC      |                                                                          |
| <i>pET28a-veri</i> -F      | CGAAGCAGCGCAACGATAT                          | Verify the construction of pET28a- <i>czcR</i>                           |
| <i>pET28a-veri</i> -R      | TTCCAGTGCGCCATCGC                            |                                                                          |
| <i>czcB</i> -RT-F          | GCGCAGAGCACCTACAA                            | qPCR                                                                     |
| <i>czcB</i> -RT-R          | GATCTCGGCTTCTGCAAA                           |                                                                          |
| <i>ptrA</i> -RT-F          | CATCGTCTTCGAGCGCAT                           | qPCR                                                                     |
| <i>ptrA</i> -RT-R          | TTGTCCTTCTTCGTGCTTC                          |                                                                          |
| <i>PA2807</i> -RT-F        | GGCGATATGTACTTCAAGCCT                        | qPCR                                                                     |
| <i>PA2807</i> -RT-R        | CATCTCCAGCATCTCCTCTG                         |                                                                          |
| <i>pcoA</i> -RT-F          | ACACCTATACCTACCTGCTCAA                       | qPCR                                                                     |
| <i>pcoA</i> -RT-R          | GGAATGCGGACGTCGAAATA                         |                                                                          |
| <i>pcoB</i> -RT-F          | TGAACAGCTTCTTCTGCTC                          | qPCR                                                                     |
| <i>pcoB</i> -RT-R          | CCACAGGCGGTTGATGT                            |                                                                          |
| <i>copA1</i> -RT-F         | GTTCTGGGCCTTCATCTACAA                        | qPCR                                                                     |
| <i>copA1</i> -RT-R         | CGCTGACGCTGGAGAAG                            |                                                                          |
| <i>copA2</i> -RT-F         | CTGATGATCGAAGGCATCAGTT                       | qPCR                                                                     |
| <i>copA2</i> -RT-R         | CGATGGTTGGACAGGTTGAG                         |                                                                          |
| <i>czcR</i> -UF            | CCCTTTCGTCTTCACAGTATCGGCATGTTCCGCTC          | Amplify upstream and downstream donor sequences for <i>czcR</i> deletion |
| <i>czcR</i> -UR            | GACAGTCGGCCTGGTGGCGGTTCCGCCCTATATAAAGTA      |                                                                          |
| <i>czcR</i> -DF            | TACTTTATATAGGGGCGAACCACCAGGCCGACTGTC         |                                                                          |
| <i>czcR</i> -DR            | GGATCAGGAATACCCCAATGGCAGGAGGAAGGGCAG         |                                                                          |
| <i>pchR</i> -UF            | CCCTTTCGTCTTCACGCAGGTCTCGACGAAGGCGA          | Amplify upstream and downstream donor sequences for <i>pchR</i> deletion |
| <i>pchR</i> -UR            | TCGGGGGTGCTGCGGAGACCAGGTTTTCTGTAGCCCCGG      |                                                                          |
| <i>pchR</i> -DF            | CCGGGCTACAGGAAAACCTGGTCTCCGCGACGACCCCGA      |                                                                          |
| <i>pchR</i> -DR            | GGATCAGGAATACCCCGCACGGAAGACAGCTCGAAC         |                                                                          |

|                |                                  |                                          |
|----------------|----------------------------------|------------------------------------------|
| <i>czcR</i> -T | AGGGCCTGACCGAAAGCGGCTACATCGTCGAC | Spacer sequence for <i>czcR</i> deletion |
| <i>pchR</i> -T | GAACATGAAGCTGGTGACCGGAACCTTCTGTT | Spacer sequence for <i>pchR</i> deletion |
